# Supplementary material
Source: ML conference proceedings conference paper supplement (https://openreview.net/forum?id=qJRlz3SucN)
Supplement: supplementary_material [file 1.xlsx]

## Sheet: Sheet1
	VaRT_median	VaRT_low	VaRT_high	BART	MLP
autompg	0.077419	0.0727343	0.0886918	0.0720974	0.0741072
concreteslump	0.0868062	0.0666181	0.109068	0.156116	0.0849251
forest	0.199269	0.191839	0.210557	0.194217	0.194821
solar	0.109585	0.104717	0.113318	0.104046	0.10473
stock	0.0357295	0.0338599	0.0491732	0.0474161	0.0488582
yacht	0.0589657	0.053733	0.0651407	0.0717853	0.0791586
airfoil	0.0797912	0.0747235	0.087505	0.094601	0.10515
autos	0.104428	0.0956969	0.116276	0.0834532	0.0940282
breastcancer	0.244091	0.223711	0.265819	0.216305	0.189397
concrete	0.0857164	0.0813463	0.0907295	0.0757253	0.0797746
fertility	0.224515	0.20378	0.245989	0.168528	0.159606
housing	0.0670046	0.0620299	0.0730687	0.0708488	0.0757017
machine	0.0974094	0.0780425	0.116415	0.0699733	0.0891404
pendulum	0.0668817	0.0609899	0.0749202	0.0710757	0.081905
servo	0.127994	0.111517	0.152134	0.079791	0.110719
skillcraft	0.0683793	0.0671573	0.0721866	0.0694659	0.0666862
sml	0.0371098	0.0360587	0.038656	0.0417442	0.038302
wine	0.0778117	0.0740817	0.0836106	0.0975113	0.0766247
