# Supplementary material
Source: ML conference proceedings conference paper supplement (https://openreview.net/forum?id=qJRlz3SucN)
Supplement: supplementary_material [file 13.xlsx]

## Sheet: Sheet1
	VaRT_median	VaRT_low	VaRT_high	BART	MLP
autompg	0.0699094	0.0656199	0.0770989	0.0723639	0.110726
concreteslump	0.0540623	0.032008	0.0784281	0.143328	0.305623
forest	0.20171	0.189146	0.216762	0.190792	0.201837
solar	0.114224	0.108359	0.120506	0.103483	0.102799
stock	0.0374768	0.0350593	0.0406075	0.0556079	0.0907045
yacht	0.0720072	0.0663453	0.0800936	0.0682987	0.0775417
airfoil	0.0831336	0.0783829	0.0895683	0.0823815	0.090562
autos	0.113616	0.0909795	0.133168	0.0802444	0.0979817
breastcancer	0.275356	0.245156	0.317968	0.232117	0.213542
concrete	0.0827142	0.0784873	0.095852	0.0775071	0.0859779
fertility	0.166662	0.156232	0.182222	0.160376	0.133378
housing	0.0792433	0.0720427	0.0860439	0.0723477	0.0804988
machine	0.10175	0.0967404	0.108136	0.0674167	0.181636
pendulum	0.0539522	0.047871	0.0833711	0.0711972	0.063982
servo	0.0870262	0.0752753	0.11005	0.088951	0.102517
skillcraft	0.0694508	0.067816	0.0712982	0.0696756	0.0689323
sml	0.0337127	0.0329115	0.0383777	0.0433657	0.0374943
wine	0.0734476	0.0698561	0.0856267	0.0978263	0.0726871
