# Supplementary material
Source: ML conference proceedings conference paper supplement (https://openreview.net/forum?id=qJRlz3SucN)
Supplement: supplementary_material [file 42.xlsx]

## Sheet: Sheet1
	VaRT_median	VaRT_low	VaRT_high	BART	MLP
autompg	0.0777902	0.0748745	0.0817683	0.0706449	0.0809681
concreteslump	0.0398548	0.0254787	0.0712709	0.139222	0.0736905
forest	0.204275	0.189747	0.21744	0.197243	0.195474
solar	0.125906	0.114778	0.148433	0.104616	0.105523
stock	0.0350727	0.0336247	0.0387362	0.0522921	0.0618835
yacht	0.0502888	0.0488311	0.0568121	0.0666643	0.0881259
airfoil	0.081386	0.0762332	0.0872295	0.0820352	0.0944091
autos	0.0947167	0.0916689	0.100211	0.0721	0.0864828
breastcancer	0.238262	0.216911	0.261741	0.21911	0.198198
concrete	0.0835668	0.0760418	0.0913223	0.0751737	0.0790535
fertility	0.177477	0.163691	0.188485	0.155646	0.160573
housing	0.0741408	0.0662594	0.0854579	0.075772	0.0701641
machine	0.0967585	0.0875267	0.107064	0.0703701	0.154327
pendulum	0.059866	0.0542155	0.0670552	0.0692084	0.0687389
servo	0.105038	0.0822848	0.132268	0.0793927	0.120947
skillcraft	0.0691713	0.0678357	0.0734796	0.0689244	0.0685929
sml	0.0354962	0.03466	0.0363728	0.0411184	0.0410835
wine	0.0744555	0.0710849	0.0779221	0.092327	0.0761288
