# Supplementary material
Source: ML conference proceedings conference paper supplement (https://openreview.net/forum?id=qJRlz3SucN)
Supplement: supplementary_material [file 314159.xlsx]

## Sheet: Sheet1
	VaRT_median	VaRT_low	VaRT_high	BART	MLP
autompg	0.0732425	0.0696789	0.0840182	0.0725964	0.0895548
concreteslump	0.014296	0.014296	0.014296	0.166804	0.0766565
forest	0.215133	0.203645	0.232839	0.192672	0.199418
solar	0.112974	0.106617	0.122977	0.103601	0.104408
stock	0.0332039	0.0321553	0.0345531	0.0456258	0.0559272
yacht	0.0591778	0.0462421	0.0859299	0.0671274	0.0753111
airfoil	0.0874631	0.0807146	0.0949076	0.0924282	0.0858837
autos	0.108093	0.0961729	0.125671	0.0682188	0.0976341
breastcancer	0.224306	0.204181	0.250797	0.219505	0.204967
concrete	0.0820969	0.0768933	0.0888884	0.0772204	0.0891426
fertility	0.221396	0.197209	0.243514	0.160516	0.169536
housing	0.0796411	0.0728482	0.0879163	0.0690704	0.0868224
machine	0.0815702	0.0711915	0.0908644	0.0710075	0.108318
pendulum	0.0532302	0.0487402	0.0598471	0.066828	0.0771133
servo	0.104153	0.0891115	0.123636	0.0825591	0.106241
skillcraft	0.0700895	0.0686753	0.0720562	0.0706259	0.0677717
sml	0.039966	0.0366347	0.0438188	0.0412244	0.032718
wine	0.0714235	0.0685806	0.0770139	0.0957434	0.0741978
