# Supplementary material
Source: ML conference proceedings conference paper supplement (https://openreview.net/forum?id=qJRlz3SucN)
Supplement: supplementary_material [file attachment]

## Sheet: Sheet1
	VaRT_median	VaRT_low	VaRT_high	BART	MLP
autompg	0.077372	0.0710973	0.0922583	0.0671015	0.0823361
concreteslump	0.0506126	0.0339144	0.0733457	0.140295	0.246171
forest	0.205914	0.197248	0.215417	0.197478	0.197063
solar	0.108138	0.103542	0.115399	0.103424	0.104643
stock	0.0342192	0.0332483	0.0361962	0.0551067	0.0411423
yacht	0.0530671	0.0483409	0.0573531	0.0683264	0.0809322
airfoil	0.0822977	0.0780795	0.0876788	0.0853875	0.0840537
autos	0.112	0.0994369	0.127846	0.0725099	0.0911937
breastcancer	0.238144	0.212256	0.267354	0.206697	0.216568
concrete	0.08439	0.0802155	0.0941004	0.0783458	0.0905394
fertility	0.193589	0.179726	0.209834	0.154107	0.167892
housing	0.068729	0.0654426	0.0781639	0.0585484	0.0714767
machine	0.0876745	0.0830217	0.0982957	0.0688919	0.182284
pendulum	0.0653369	0.0602061	0.081603	0.0701569	0.0692332
servo	0.10237	0.0939444	0.116113	0.0826337	0.110833
skillcraft	0.068903	0.0667266	0.0798807	0.0708411	0.0738136
sml	0.0315926	0.0304947	0.0461329	0.040608	0.0423724
wine	0.0758328	0.0728192	0.0790013	0.0898721	0.0758439
